# Supplementary material
Source: HighWire-hosted journal article supplement (https://bmjopen.bmj.com/content/7/2/e012189)
Supplement: inline-supplementary-material-1 [file inline-supplementary-material-1.pdf]

Supplemental Table 1: Logistic regression for fall risk, excluding insurance status variable.

| <b>Variable</b>        | <b>Odds ratio</b> | <b>[ 95% Conf Interval ]</b> |       |
|------------------------|-------------------|------------------------------|-------|
| Age (years)            | 1.001             | 0.996                        | 1.006 |
| Medication count       | 1.016             | 1.002                        | 1.031 |
| Sex (male)             | 1.057             | 0.970                        | 1.152 |
| Charlson score         | 1.062             | 1.057                        | 1.066 |
| Adverse effect burden  | 1.070             | 1.038                        | 1.103 |
| Race (white)           | 1.306             | 1.193                        | 1.430 |
| Primary psychiatric dx | 1.357             | 1.189                        | 1.545 |
| Index admission via ER | 1.426             | 1.305                        | 1.557 |

dx, diagnosis

ER, emergency room
